# Supplementary material for: The recognition domain of the methyl-specific endonuclease McrBC flips out 5-methylcytosine
Source: PubMed Central journal article supplement — Nucleic Acids Res. 2012 May 8;40(15):7552–62. doi: 10.1093/nar/gks332 (PMC3424535; doi:10.1093/nar/gks332), 2012-05-08
Supplement: supp_gks332_nar-00732-h-2012-File008.pdf [file supp_gks332_nar-00732-h-2012-File008.pdf]

## **Supplementary material**

# **The recognition domain of the methyl-specific endonuclease McrBC flips out 5-methylcytosine**

Rasa Sukackaite, Saulius Grazulis, Gintautas Tamulaitis, Virginijus Siksnys\*

Department of Protein-DNA Interactions, Institute of Biotechnology,  
Vilnius University, Graiciuno 8, 02241 Vilnius, Lithuania

\* Corresponding author

Supplementary figures S1-S4  
Supplementary table 1

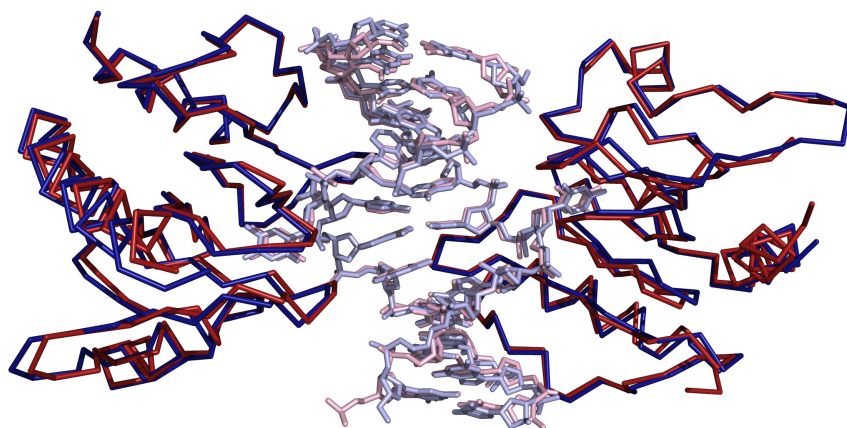

**Figure S1.** Overlay of the McrB-N/(m/m) and McrB-N/(m/-) structures. The McrB-N complex with di-methylated (m/m) DNA (Table 1) is shown in red, while the McrB-N complex with hemi-methylated (m/-) DNA is shown in blue. The hemi-methylated DNA can be also bound in the opposite orientation.

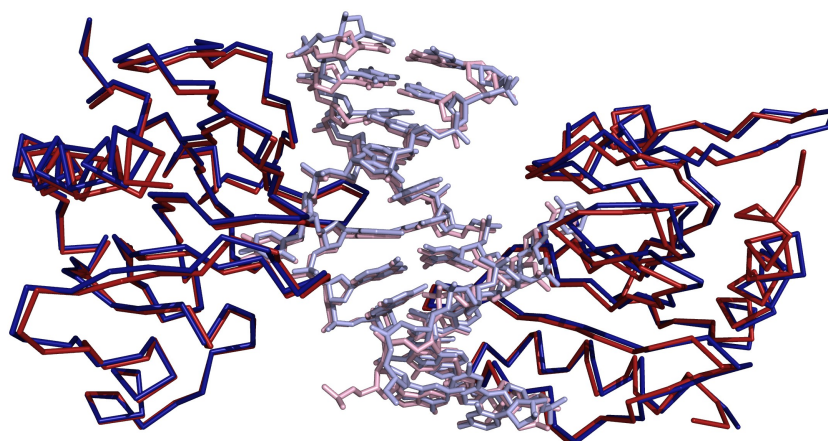

**Figure S2.** Overlay of the McrB-N/(m/m) and McrB-N/(-/-) structures. The McrB-N complex with dimethylated (m/m) DNA (Fig. 1B) is shown in red, while the McrB-N complex with non-methylated (-/-) DNA is shown in blue.

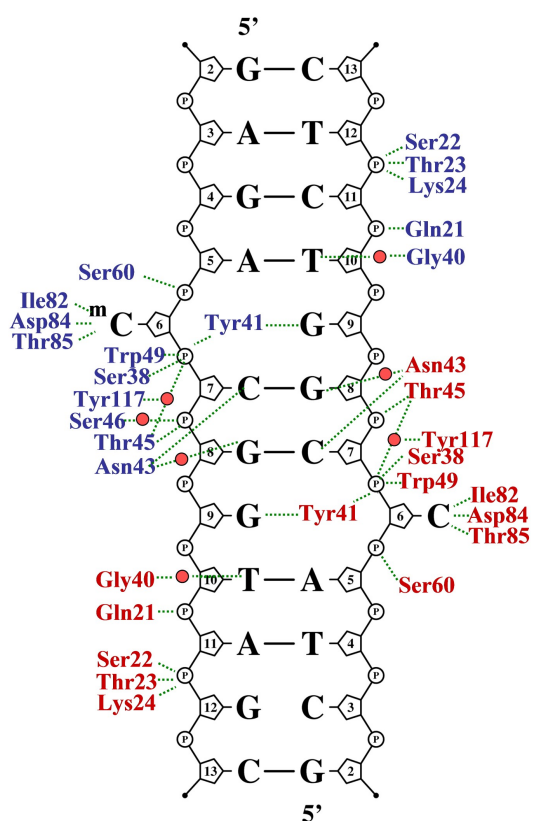

McrB-N/(m/-)

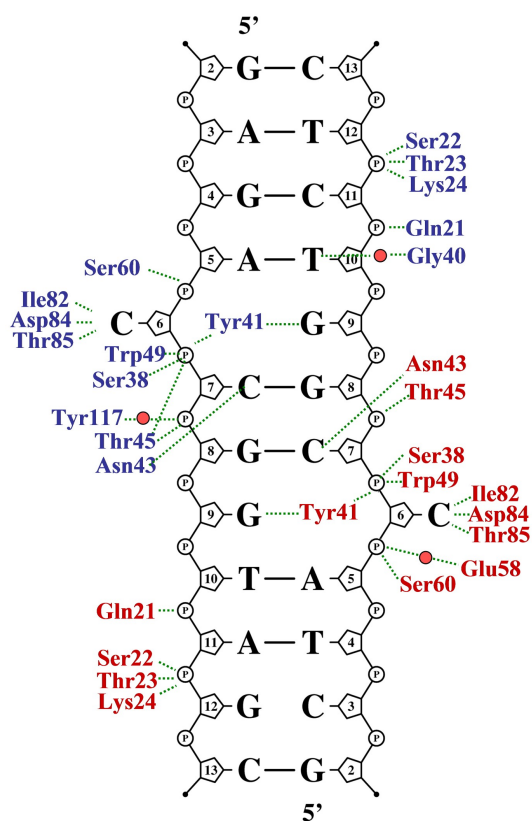

McrB-N/(-/-)

**Figure S3.** Schemes showing hydrogen bonds in the McrB-N/hemi-methylated DNA (m/-) (Fig. 1B) and McrB-N/non-methylated DNA (-/-) complexes. Residues from different McrB-N monomers are shown in blue and red, water molecules are shown as red spheres.

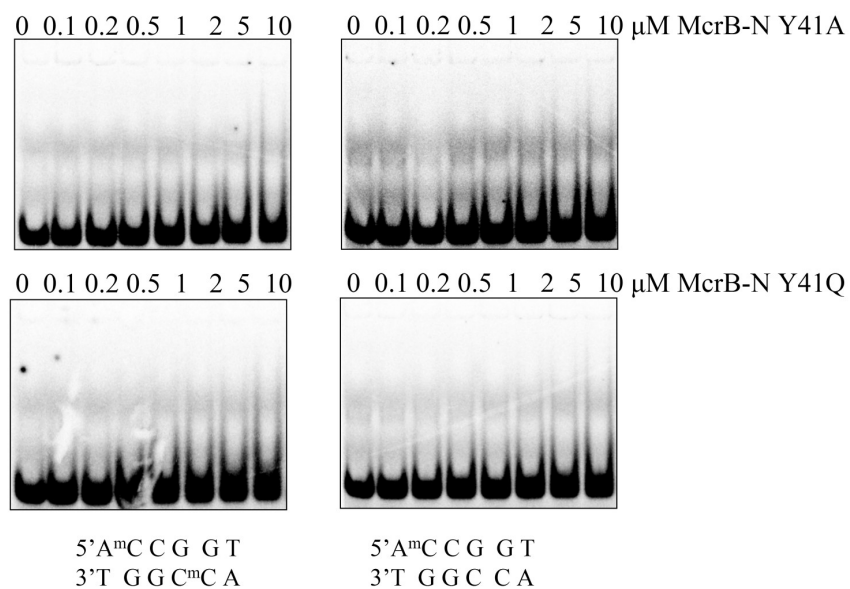

**Figure S4.** Gel mobility shift analysis for McrB-N Tyr41 mutants binding to DNA. McrB-N Y41A and Y41Q mutants at concentrations indicated above the relevant lanes were mixed with the di-methylated (m/m) or hemi methylated (-/m) DNA (Figure 1B) at the final concentration of 100 nM. The samples were electrophoresed through 8% PAA gels under native conditions.

**Table S1. Datasets**

| <b>Dataset</b>                  | <b>I</b>                                                                | <b>II</b>                  | <b>III</b>                 | <b>IV</b>                                                               | <b>Pt-peak</b>          | <b>Pt-infl</b> |
|---------------------------------|-------------------------------------------------------------------------|----------------------------|----------------------------|-------------------------------------------------------------------------|-------------------------|----------------|
| Oligoduplex<br>(Fig. 1B)        | (m/m)                                                                   | (m/-)                      | (m/-)                      | (-/-)                                                                   | (m/-)                   |                |
| Crystallization<br>conditions   | 0.1 M Bis-Tris<br>(pH=5.5), 0.2 M<br>NH <sub>4</sub> Cl, 22%<br>PEG3350 | 0.2 M LiCl, 18%<br>PEG4000 | 0.2 M LiCl, 20%<br>PEG4000 | 0.1 M Bis-Tris<br>(pH=5.5), 0.2 M<br>NH <sub>4</sub> Cl, 30%<br>PEG4000 | 0.2 M LiCl, 22% PEG4000 |                |
| X-ray source                    | EMBL X11                                                                | EMBL X11                   | EMBL X12                   | RU-H3R                                                                  | EMBL X12                |                |
| Wavelength (Å)                  | 0.81480                                                                 | 0.81500                    | 1.72196                    | 1.5418                                                                  | 1.07009                 | 1.07065        |
| Spacegroup                      | P2 <sub>1</sub> 2 <sub>1</sub> 2 <sub>1</sub>                           |                            |                            |                                                                         |                         |                |
| Cell constants (Å)              |                                                                         |                            |                            |                                                                         |                         |                |
| a                               | 35.40                                                                   | 36.09                      | 36.09                      | 36.05                                                                   | 36.32                   |                |
| b                               | 67.46                                                                   | 67.19                      | 68.58                      | 69.09                                                                   | 69.43                   |                |
| c                               | 140.77                                                                  | 142.41                     | 143.64                     | 143.89                                                                  | 144.36                  |                |
| Resolution (Å)                  | 35.3–2.1                                                                | 29–2.3                     | 68.5–2.6                   | 62.3–2.7                                                                | 62.6–2.5                | 62.6–2.5       |
| Completeness (%)                | 94.4 (51) <sup>a</sup>                                                  | 99.8 (99.9)                | 95.6 (94.8)                | 100 (100)                                                               | 100 (100)               | 100 (100)      |
| Multiplicity                    | 4.2 (2.1)                                                               | 5.6 (5.3)                  | 43.1 (42.6)                | 5.6 (5.7)                                                               | 13.8 (14.2)             | 13.8 (14.1)    |
| I/σ <sub>I</sub>                | 3.1 (2.3)                                                               | 6.1 (1.9)                  | 7.7 (2.1)                  | 5.3 (1.7)                                                               | 7.5 (2.9)               | 6.5 (2.1)      |
| R <sub>merge</sub> <sup>b</sup> | 12.9 (25.1)                                                             | 7.0 (25.4)                 | 7.9 (36.0)                 | 13.2 (44.4)                                                             | 8.5 (32.3)              | 8.6 (36.4)     |

<sup>a</sup>Values in parentheses refer to data in the highest resolution shell.

<sup>b</sup> $R_{\text{merge}} = \sum |I_{hi} - \langle I_h \rangle| / \sum I_{hi}$ , where  $I_{hi}$  is an intensity value of the  $i$ -th measurement of reflection  $h$  and  $\langle I_h \rangle$  is the average measured intensity of reflection  $h$ .
